# Supplementary material for: Initiation of Hippo signaling is linked to polarity rather than to cell position in the pre-implantation mouse embryo
Source: Oxford University Press journal article supplement (doi:10.1242/dev.107276), 2014-06-20
Supplement: dev107276_supp.pdf [file dev107276_supp.pdf]

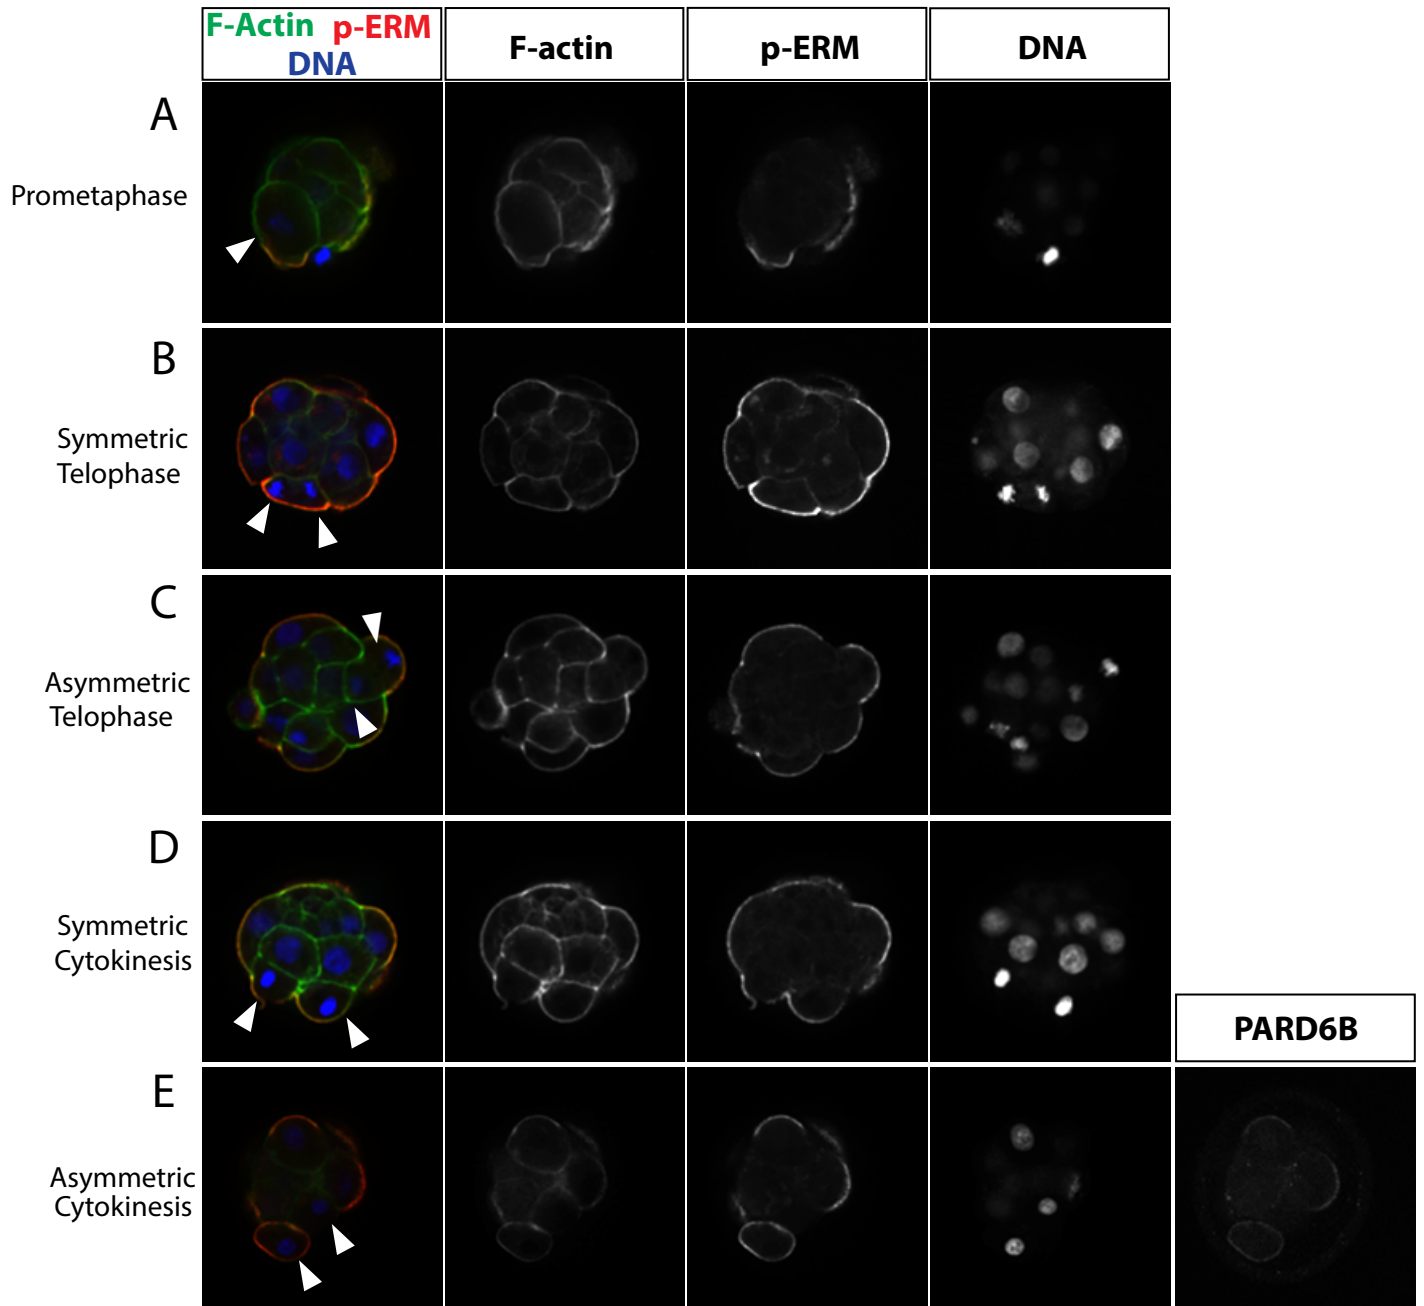

**Supplementary Figure 1.**

**Apical domains are maintained during 8-16 cell divisions.**

A. Prometaphase. B. Telophase of symmetric division. C. Telophase of asymmetric division. D. Cytokinesis of symmetric division. E. Cytokinesis of asymmetric division. p-ERM and PARD6B localization at the apical domain are maintained through the mitotic phase.

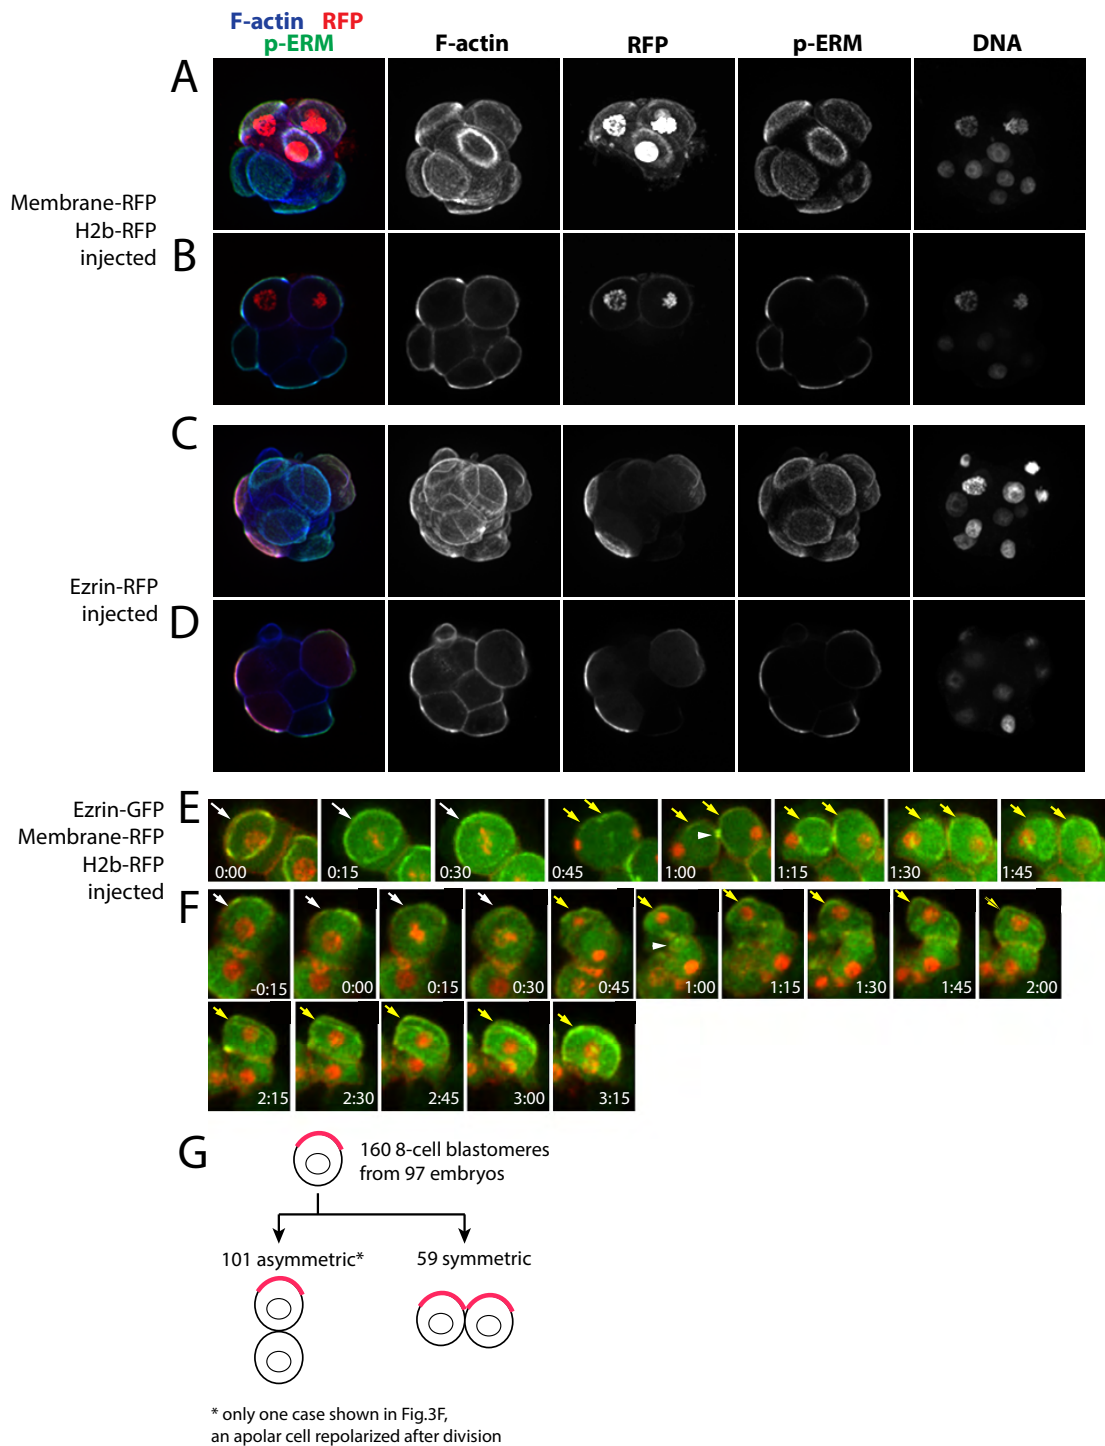

## Supplementary Figure 2.

### Fluorescent reporters, membrane-RFP and Ezrin GFP/RFP are enriched at the apical domain in progeny of mRNA injected blastomeres.

A and B. Membrane-RFP and histone H2b-RFP injected embryo. mRNAs of the reporters were injected into one of 2-cell blastomeres. A. Projected images. B. Optical section images. Membrane-RFP is enriched at the apical domain marked by F-actin and p-ERM staining. C and D. Ezrin-RFP injected embryo. C. Projected images. D. Optical section images. Ezrin-RFP enrichment co-localized with p-ERM staining. E and F. Time-lapse images of Ezrin-GFP, membrane-RFP and H2B-RFP injected embryos. Projected images. E. 8-cell blastomere dividing symmetrically. (t=0:00) One frame (15min) before entering mitosis. An apical domain is clearly visible (arrows). (t=0:30) Metaphase. (t=1:00) Cytokinesis. Contractile ring (arrowhead). (t=1:30) Two daughter polar 16-cells (yellow arrows). F. 8-cell blastomere dividing asymmetrically. (t=0:00) One frame before entering mitosis. Apical domain (arrows). (t=0:30) Prometaphase. (t=1:00) Cytokinesis. (t=1:30) One polar (yellow arrows) and one apolar daughter cell. (t=2:45) The apolar cell internalizes. Interestingly, Ezrin-GFP enrichment becomes less clear during cell division in live imaging, although it is still enriched in the fixed embryo shown in C and D. G. Schematic of division patterns of single 8-cell blastomeres. A total of 160 8-cell blastomeres from 97 embryos were observed. 101 blastomeres divided asymmetrically and 59 blastomeres divided symmetrically. Only one apolar cell repolarized after asymmetric division.

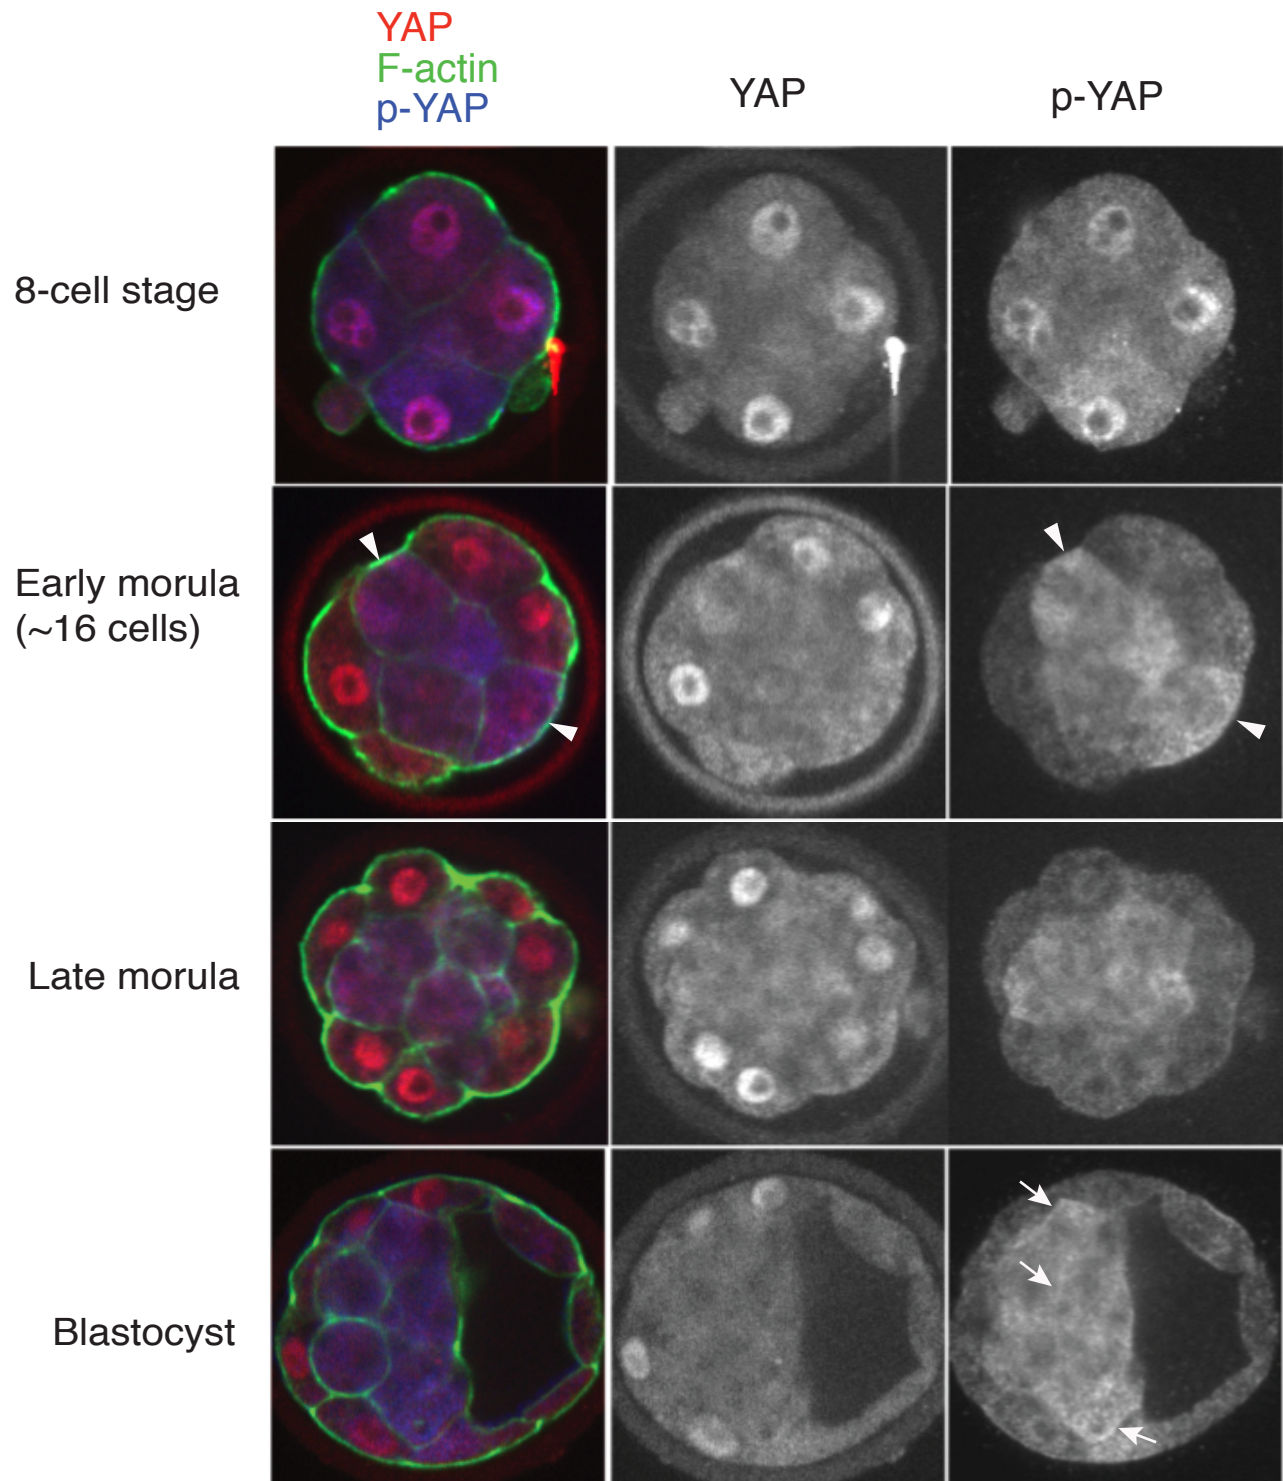

### Supplementary Figure 3.

#### YAP and phosphorylated YAP (p-YAP) localization in preimplantation mouse embryos.

8-cell stage. YAP nuclear localization is observed in all blastomeres. At this stage, p-YAP is also localized in the nucleus.

Early morula stage (~16 cells). Polar cells show YAP nuclear localization with low levels of p-YAP in the nucleus and cytoplasm, while apolar cells show higher cytoplasmic p-YAP. No YAP nuclear localization in apolar cells. At this stage, some apolar cells are at outer positions (white arrowheads).

Late morula stage (~32 cells). Outer polar cells show YAP nuclear localization with low levels of pYAP, while apolar cells show higher cytoplasmic p-YAP. By this stage, all apolar cells are located at inner positions with high p-YAP in the cytoplasm.

Blastocyst stage. Outer TE cells show YAP nuclear localization while ICM cells show high p-YAP in the cytoplasm. Enrichment of p-YAP at cell membrane/cortex is observed (white arrows).

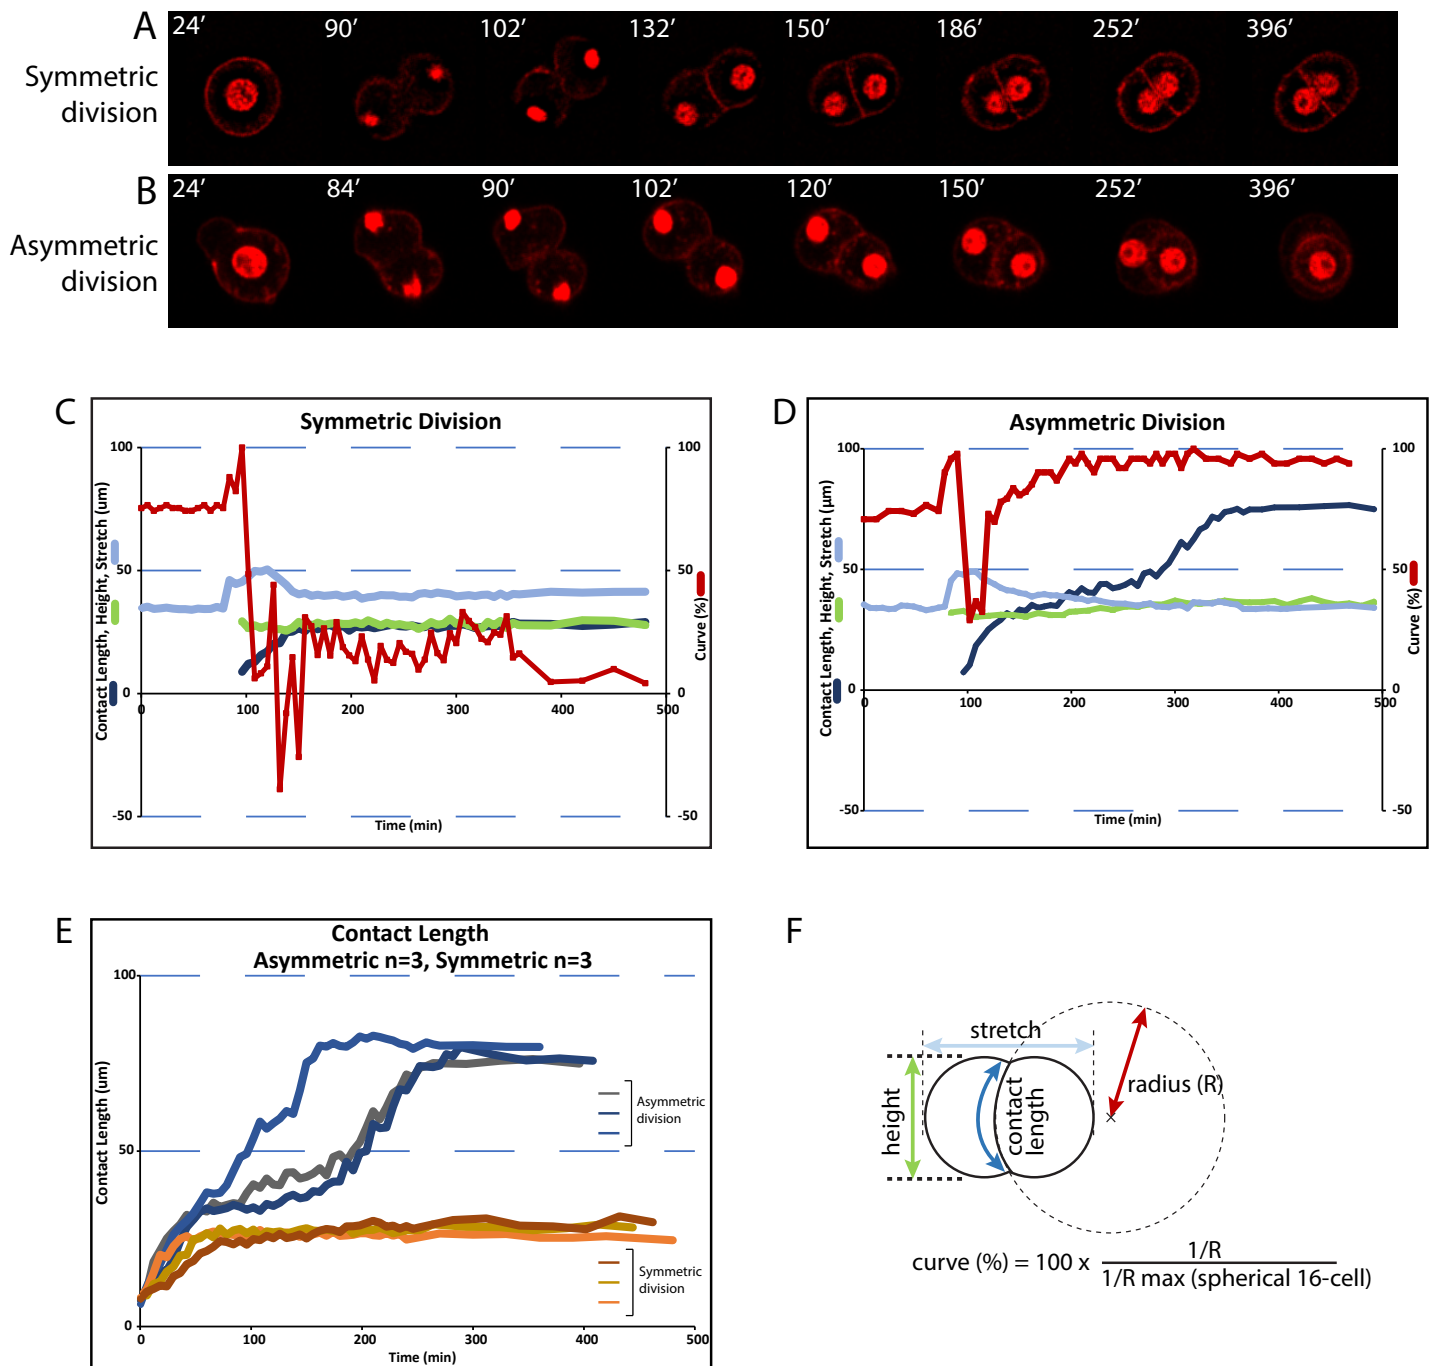

#### Supplementary figure 4.

#### Division dynamics in isolated 8-cell blastomeres injected with membrane-RFP and H2b-RFP mRNAs.

A, B. Time-lapse images of isolated 8-cell blastomeres dividing symmetrically (A) or asymmetrically (B). Images were taken every 3 minutes (min). Time= 0 is set at 30 min (10 frames) before nuclear envelope breakdown. A. After completion of cytokinesis ( $t=102$  min), two polar sister cells quickly establish cell-cell contact and are opposed. B. After completion of cytokinesis ( $t=90$  min), a polar (left) and an apolar (right) cell quickly establish cell-cell contact (by  $t=102$  min). The cell-cell contact boundary curves toward the polar cell ( $t=120$  to  $252$  min). The polar cell starts enveloping the apolar cell ( $t=253$  to  $396$  min). C and D. Quantification of four parameters of membrane- and H2b-RFP mRNA-injected isolated 8-cell blastomere dividing symmetrically (C) or asymmetrically (D). E. Variability in timing of envelopment in polar/apolar 2/16 couplets. Basically, we observed the same cell dynamics observed in DIC images shown Figure 5. F. The parameters are: Height ( $\mu\text{m}$ , green), stretch ( $\mu\text{m}$ , light blue), contact length ( $\mu\text{m}$ , blue) and curve (%). Curve is indicated as % of the maximum (defined as  $1/R$  of a circle drawn to fit an enveloped 16-cell blastomere).

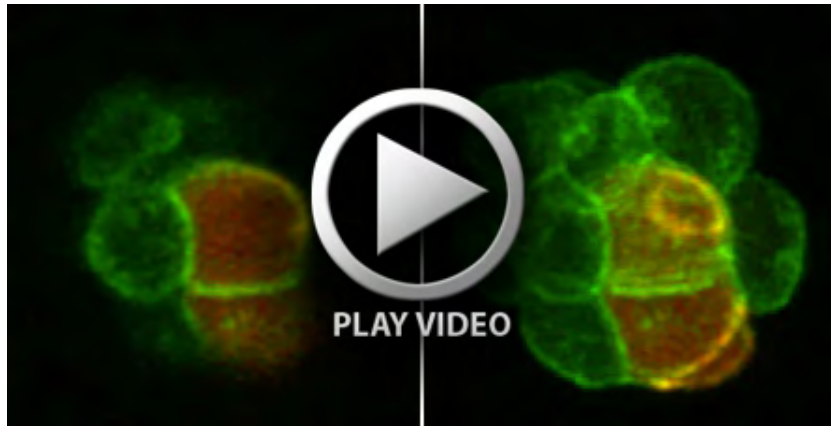

**Supplementary movie 1.**

**Time-lapse movie showing the internalization process of apolar outer cells.** The embryo is labeled with GAP-43 GFP for cell shape visualization and Ezrin-RFP for apical domain visualization. The left movie shows optical section images at Z=2 and the right movie shows projected images generated from 9 optical sections. 15 min/frame.

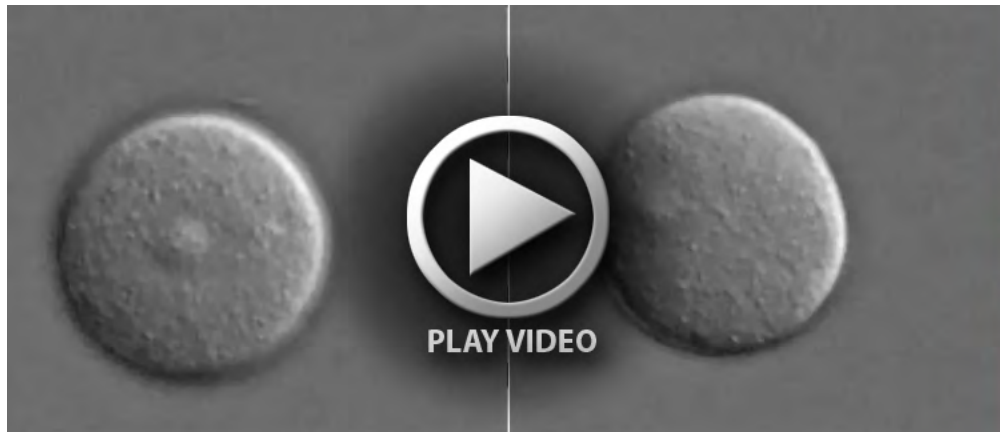

**Supplementary movie 2.**

**Time-lapse movie showing divisions of isolated 8-cell blastomeres and subsequent 16-cell couplet formation.** The left movie shows a blastomere dividing symmetrically and the right shows one dividing asymmetrically. Three Z-section images were collected. The middle section is shown. 3 min/frame.
